# Supplementary material for: High-Sensitivity Dual-Probe Detection of Urinary miR-141 in Cancer Patients via a Modified Screen-Printed Carbon Electrode-Based Electrochemical Biosensor
Source: MDPI journal article supplement (doi:10.3390/s21093183), 2021-05-03
Supplement: s1 [file s1]

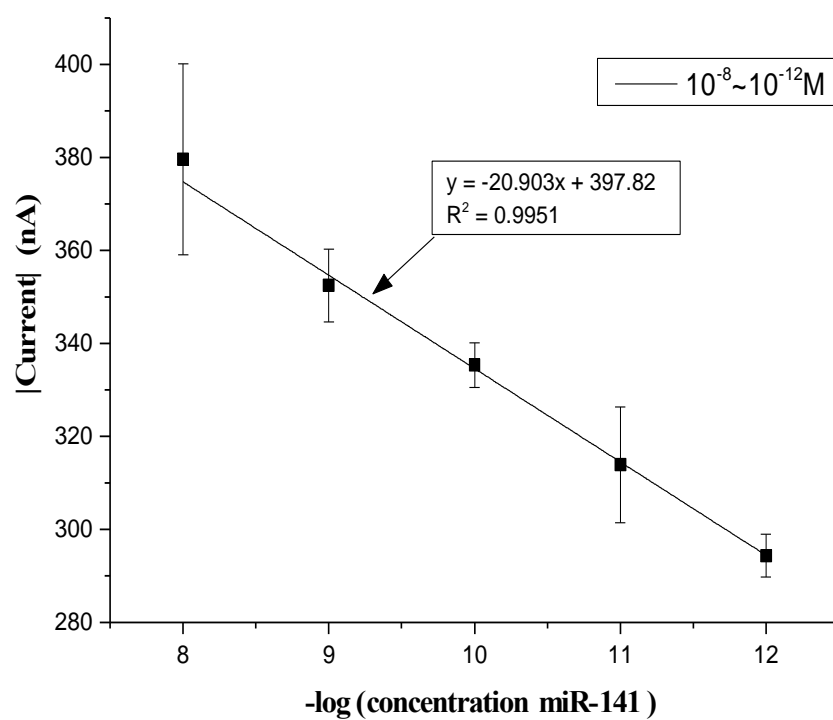

**Figure S1.** Calibration plot of miR-141 concentration and CA current response. The corresponding CA current response with miR-141 concentration, ranging from  $10^{-8} \text{ M}$  to  $10^{-12} \text{ M}$ , producing  $R^2 = 0.9951$ .

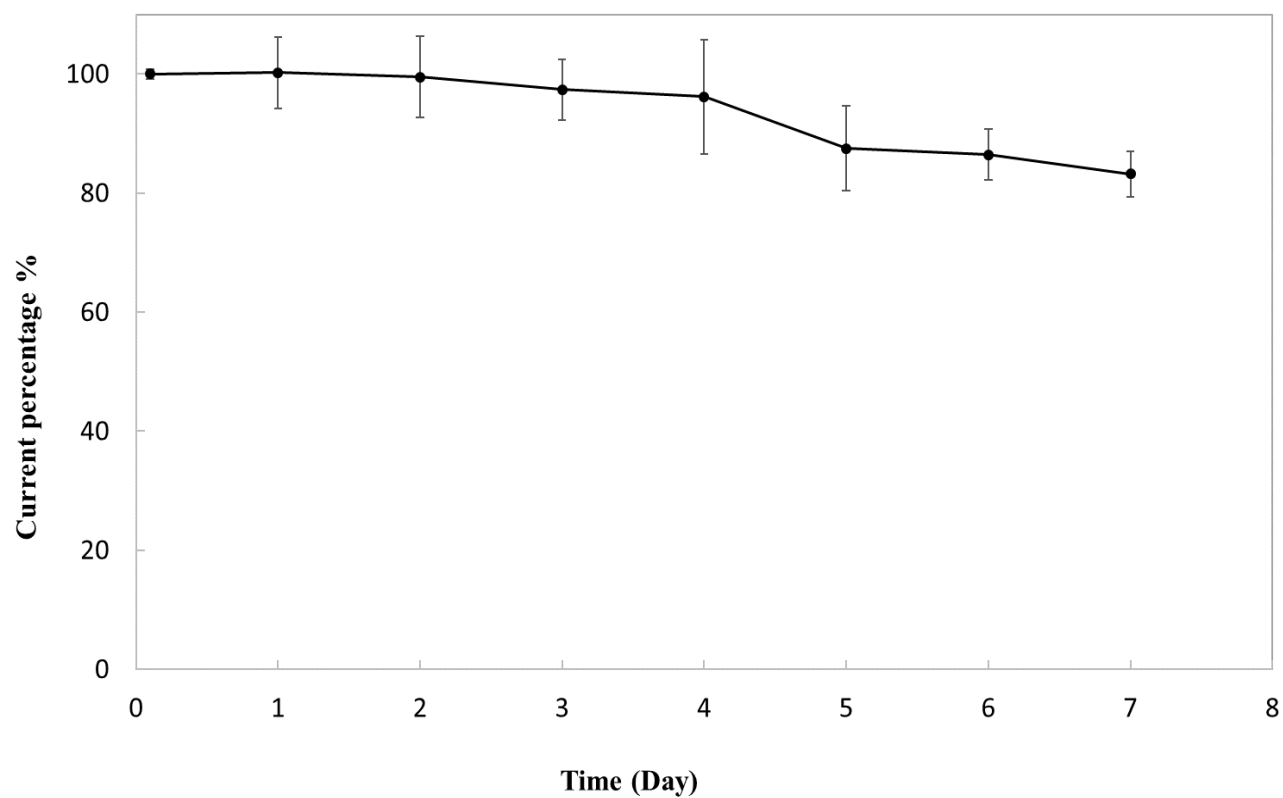

**Figure S2.** Current reduction over time measured in percentage (denominator being day 0 current response). A steady decline of current response over a seven-day period, maintaining 80% of its original capacity and accuracy.
